# Supplementary material for: Functionalizing micro-3D-printed protein hydrogels for cell adhesion and patterning
Source: Royal Society of Chemistry journal article supplement (doi:10.1039/c5tb02070k), 2016-01-01
Supplement: c5tb02070k3.pdf [file c5tb02070k3.pdf]

## Supporting Information

### **Functionalizing micro-3D-printed protein hydrogels for cell adhesion and patterning**

*Derek S. Hernandez, Eric T. Ritschdorff, Stephanie K. Seidlits, Christine E. Schmidt, and Jason B. Shear\**

Figure S1. Time-lapse video of Schwann cell patterning.

Figure S2. Time-lapse video of Schwann cell patterning in 3D.
